# Supplementary material for: Evaluation of S- and M-Proteins Expressed in Escherichia coli and HEK Cells for Serological Detection of Antibodies in Response to SARS-CoV-2 Infections and mRNA-Based Vaccinations
Source: MDPI journal article supplement (doi:10.3390/pathogens11121515), 2022-12-10
Supplement: s1 [file s1]

## *Supplementary Material*

# **Evaluation of S- and M-Proteins Expressed in *Escherichia coli* and HEK Cells for Serological Detection of Antibodies in Re-Sponse to SARS-CoV-2 Infections and mRNA-Based Vaccinations**

**Mandy Schwarze <sup>1,2,†</sup>, Ji Luo <sup>1,2,3,†</sup>, Alexandra Brakel <sup>1,2</sup>, Andor Krizsan <sup>1,2</sup>, Nicole Lakowa <sup>4</sup>, Thomas Grünewald <sup>4</sup>, Claudia Lehmann <sup>5</sup>, Johannes Wolf <sup>6,7</sup>, Stephan Borte <sup>6,7</sup>, Sanja Milkovska-Stamenova <sup>1,2,3</sup>, Jörg Gabert <sup>3</sup>, Markus Scholz <sup>8,9</sup>, and Ralf Hoffmann <sup>1,2,\*</sup>**

<sup>1</sup> Institute of Bioanalytical Chemistry, Faculty of Chemistry and Mineralogy, Universität Leipzig, 04103 Leipzig, Germany

<sup>2</sup> Center for Biotechnology and Biomedicine, Universität Leipzig, 04103 Leipzig, Germany

<sup>3</sup> Adversis Pharma GmbH, 04103 Leipzig, Germany

<sup>4</sup> Klinik für Infektions- und Tropenmedizin, Klinikum Chemnitz gGmbH, 09113 Chemnitz, Germany

<sup>5</sup> Laboratory for Transplantation Immunology, Institute for Transfusion Medicine, University Hospital Leipzig, 04103 Leipzig, Germany

<sup>6</sup> Department of Laboratory Medicine, Hospital St. Georg gGmbH, 04129 Leipzig, Germany

<sup>7</sup> Immuno Deficiency Center Leipzig, Jeffrey Modell Diagnostic and Research Center for Primary Immunodeficiency Diseases, Hospital St. Georg gGmbH, 04129 Leipzig, Germany

<sup>8</sup> Institute for Medical Informatics, Statistics and Epidemiology, Universität Leipzig, 04107 Leipzig, Germany

<sup>9</sup> LIFE Research Center of Civilization Diseases, Universität Leipzig, 04103 Leipzig, Germany

\* Correspondence: bioanaly@rz.uni-leipzig.de

† These authors contributed equally to this work.

## Table of Contents

|                                                                                       |     |
|---------------------------------------------------------------------------------------|-----|
| Optimization of ELISA .....                                                           | S3  |
| Table S1: Clinical parameters of patient serum samples .....                          | S4  |
| Table S2: Clinical parameters of vaccinated and infected serum samples .....          | S11 |
| Table S3: List of tested peptides with corresponding sequences.....                   | S14 |
| Figure S1: Optimization of the S1 <i>E. coli</i> ELISA .....                          | S15 |
| Figure S2: Optimization of the RBD <i>E. coli</i> ELISA .....                         | S16 |
| Figure S3: Testing of DTT as additive for RBD and S1 <i>E. coli</i> ELISA .....       | S17 |
| Figure S4: Optimization of the M-protein <i>E. coli</i> ELISA .....                   | S18 |
| Figure S5: SDS-PAGE and corresponding immunoblots of purified SARS-CoV-2 proteins.... | S19 |
| Figure S6: Calculated ROC-curves of IgG and IgA ELISAs .....                          | S20 |
| Figure S7: Comparison between RBD, HEK monomer, dimer, and commercial RBDs.....       | S21 |
| Figure S8: N-protein IgG ELISA of vaccinated and infected samples .....               | S22 |
| Figure S9: RBD and S1 peptide IgG ELISA.....                                          | S23 |
| Figure S10: Comparison of IgA and IgG M-protein ELISA.....                            | S24 |
| Figure S11: M peptide IgG ELISA .....                                                 | S25 |
| Figure S12: Advanced M IgG ELISA of the previously most promising peptides .....      | S26 |
| Figure S13: Scatter Plot of the time- grouped samples with the best M-peptides.....   | S27 |
| Figure S14: RBD- and N-protein ELISA of false positive samples .....                  | S28 |
| Figure S15: RBD- and S1-protein Glycostain.....                                       | S29 |
| Figure S16: N-protein ELISA .....                                                     | S30 |

## Optimization of ELISA

The indirect ELISA for anti-SARS-CoV-2 IgG antibodies was initially established for S1-protein expressed in *E. coli* to accelerate the assay development. First, the coating of the S1-protein was evaluated for carbonate buffer (pH 9.6), PBS (pH 7.4), and acetate buffer (pH 5.0) using an anti-His antibody and a negative pool (off-the-clot, sterile filtered; PAN-Biotech GmbH, Aidenbach, Germany) (Figure S1a). PBS provided the best ratio between anti-His antibody and negative pool. When S1-protein was coated in PBS buffer using a twofold dilution series from 1 µg/well to 1 ng/well, the OD<sub>450</sub>-values decreased from 3.413 to 0.215 (Figure S1b) with the upper plateau of the curve starting at 63.0 ng/well. As lower quantities might increase the risk of pipetting errors during the dilution step, all further experiments used a coating of 250 ng/well S1-protein in PBS. When the same tests were repeated with the RBD-protein, again PBS appeared to provide the best coating conditions (Figure S2). When these conditions were tested on medium binding plates from Greiner Bio-One (Frickenhausen, Germany) or Brand GmbH + Co. KG (Wertheim, Germany) and Maxisorp (Nunc, Roskilde, Denmark), the medium binding plate from Greiner provided the best performance based on the ratio of anti-His antibody and negative serum pool (Supplement, Figure S1c). These conditions optimized for recombinant S1- and RBD-proteins expressed in *E. coli* were also applied to S1- and RBD-proteins expressed in HEK cells.

To increase the selectivity, we additionally tested the *E. coli* proteins under reducing conditions in PBS supplemented with NaCl (200 mmol/L), urea (8 mol/L) and DTT (5 mmol/L) (Figure S3 and S4). However, no differences were observed for RBD-, S1-, and M-protein expressed in *E. coli*. Since the M-protein ELISA did not provide a good difference between positive and negative samples, the M-protein was coated in PBS and PBS supplemented with urea (4 mol/L) using the anti-His (10,000-fold dilution in Stabilzyme), a SARS-CoV-2 positive pool, and a negative pool. The best ratio of positive and negative pools was obtained when coating the M-protein (125 ng/well) in PBS supplemented with urea (4 mol/L; Figure S4).

Table S1. Clinical parameters of all patient serum samples included in the current study. The sample written in bold was obtained from a patient infected with SARS-CoV-2 variant B1.1.7.

| Name  | Origin        | Sex | Age | Days after symptom onset | Days after PCR | RBD IgG (209) | M IgG (167) | M IgA (167) | RBD IgA (207) | N IgG (207) |
|-------|---------------|-----|-----|--------------------------|----------------|---------------|-------------|-------------|---------------|-------------|
| C1    | Chemnitz 2020 | -   | -   |                          | 54             | x             | x           | x           | x             | x           |
| C2    | Chemnitz 2020 | -   | -   |                          | 50             | x             | x           | x           | x             | x           |
| C3    | Chemnitz 2020 | -   | -   |                          | 71             | x             | x           | x           | x             | x           |
| C4    | Chemnitz 2020 | -   | -   |                          | 50             | x             | x           | x           | x             | x           |
| C5    | Chemnitz 2020 | -   | -   |                          | 69             | x             | x           | x           | x             | x           |
| C6    | Chemnitz 2020 | -   | -   |                          | 70             | x             | x           | x           | x             | x           |
| C7    | Chemnitz 2020 | -   | -   |                          | 60             | x             | x           | x           | x             | x           |
| C8    | Chemnitz 2020 | -   | -   |                          | 79             | x             | x           | x           | x             | x           |
| C9    | Chemnitz 2020 | -   | -   |                          | 59             | x             | x           | x           | x             | x           |
| C10   | Chemnitz 2020 | -   | -   |                          | 67             | x             | x           | x           | x             | x           |
| C11   | Chemnitz 2020 | -   | -   |                          | 28             | x             | x           | x           | x             | x           |
| C12   | Chemnitz 2020 | -   | -   |                          | 68             | x             | x           | x           | x             | x           |
| C13.1 | Chemnitz 2020 | w   | 67  |                          | 0              | x             | x           | x           | x             | x           |
| C13.2 | Chemnitz 2020 | w   | 67  |                          | 10             | x             | x           | x           | x             | x           |
| C13.3 | Chemnitz 2020 | w   | 67  |                          | 33             | x             | x           | x           | x             | x           |
| C14.1 | Chemnitz 2020 | m   | 68  |                          | 1              | x             | x           | x           | x             | x           |
| C14.2 | Chemnitz 2020 | m   | 68  |                          | 23             | x             | x           | x           | x             | x           |
| C15   | Chemnitz 2020 | m   | 80  |                          | 36             | x             | x           | x           | x             | x           |
| C16   | Chemnitz 2020 | m   | 57  |                          | 41             | x             | x           | x           | x             | x           |
| C17   | Chemnitz 2020 | w   | 51  |                          | 24             | x             | x           | x           | x             | x           |
| C18   | Chemnitz 2020 | m   | 67  |                          | 25             | x             | x           | x           | x             | x           |
| C19   | Chemnitz 2020 | w   | 64  |                          | 25             | x             | x           | x           | x             | x           |

|       |                  |   |    |    |   |   |   |   |   |
|-------|------------------|---|----|----|---|---|---|---|---|
| C20   | Chemnitz<br>2020 | w | 58 | 32 | x | x | x | x | x |
| C21   | Chemnitz<br>2020 | w | 62 | 22 | x | x | x | x | x |
| C22   | Chemnitz<br>2020 | w | 33 | 33 | x | x | x | x | x |
| C23   | Chemnitz<br>2020 | w | 62 | 6  | x | x | x | x | x |
| C24   | Chemnitz<br>2020 | w | 54 | 35 | x | x | x | x | x |
| C25   | Chemnitz<br>2020 | m | 56 | 32 | x | x | x | x | x |
| C26   | Chemnitz<br>2020 | m | 78 | 0  | x | x | x | x | x |
| C27   | Chemnitz<br>2020 | w | 88 | 5  | x | x | x | x | x |
| C28   | Chemnitz<br>2020 | w | 93 | 0  | x | x | x | x | x |
| C29   | Chemnitz<br>2020 | m | 66 | 27 | x | x | x | x | x |
| C30   | Chemnitz<br>2020 | m | 76 | 2  | x | x | x | x | x |
| C31   | Chemnitz<br>2020 | m | 82 | 5  | x | x | x | x | x |
| C32.1 | Chemnitz<br>2020 | w | 79 | 1  | x | x | x | x | x |
| C32.2 | Chemnitz<br>2020 | w | 79 | 20 | x | x | x | x | x |
| C33   | Chemnitz<br>2020 | - | -  | 1  | x | x | x | x | x |
| C34   | Chemnitz<br>2020 | m | 66 | 9  | x | x | x | x | x |
| C35   | Chemnitz<br>2020 | m | 80 | 3  | x | x | x | x | x |
| C36   | Chemnitz<br>2020 | m | 81 | 16 | x | x | x | x | x |
| C37.1 | Chemnitz<br>2020 | m | 37 | 2  | x | x | x | x | x |
| C37.2 | Chemnitz<br>2020 | m | 37 | 26 | x | x | x |   | x |
| C38.1 | Chemnitz<br>2020 | w | 75 | 1  | x | x | x | x | x |
| C38.2 | Chemnitz<br>2020 | w | 75 | 15 | x | x | x | x | x |
| C39   | Chemnitz<br>2020 | w | 71 | 20 | x | x | x | x | x |
| C40   | Chemnitz<br>2020 | m | 75 | 4  | x | x | x | x | x |
| C41   | Chemnitz<br>2020 | - | -  | 0  | x | x | x | x | x |
| C42   | Chemnitz<br>2020 | - | -  | 19 | x | x | x | x | x |

|      |                   |   |    |    |   |   |   |   |   |
|------|-------------------|---|----|----|---|---|---|---|---|
| SG1  | St. Georg<br>2020 | m | 35 | 38 | x | x | x | x | x |
| SG2  | St. Georg<br>2020 | f | 54 | 43 | x | x | x | x | x |
| SG3  | St. Georg<br>2020 | f | 64 | 37 | x | x | x | x | x |
| SG4  | St. Georg<br>2020 | m | 25 | 3  | x | x | x | x | x |
| SG5  | St. Georg<br>2020 | f | 38 | 54 | x | x | x | x | x |
| SG6  | St. Georg<br>2020 | m | 78 | 40 | x | x | x | x | x |
| SG7  | St. Georg<br>2020 | f | 90 | 34 | x | x | x | x | x |
| SG8  | St. Georg<br>2020 | m | 47 | 44 | x | x | x | x | x |
| SG9  | St. Georg<br>2020 | f | 58 | 35 | x | x | x | x | x |
| SG10 | St. Georg<br>2020 | m | 55 | 36 | x | x | x | x | x |
| SG11 | St. Georg<br>2020 | m | 59 | 38 | x | x | x | x | x |
| SG12 | St. Georg<br>2020 | m | 54 | 44 | x | x | x | x | x |
| SG13 | St. Georg<br>2020 | f | 51 | 31 | x | x | x | x | x |
| SG14 | St. Georg<br>2020 | m | 53 | 49 | x | x | x | x | x |
| SG15 | St. Georg<br>2020 | f | 65 | 33 | x | x | x | x | x |
| SG16 | St. Georg<br>2020 | m | 24 | 23 | x | x | x | x | x |
| SG17 | St. Georg<br>2020 | m | 28 | 44 | x | x | x | x | x |
| SG18 | St. Georg<br>2020 | f | 64 | 53 | x | x | x | x | x |
| SG19 | St. Georg<br>2020 | f | 39 | 38 | x | x | x | x | x |
| SG20 | St. Georg<br>2020 | m | 63 | 51 | x | x | x | x | x |
| SG21 | St. Georg<br>2020 | m | 42 | 55 | x | x | x | x | x |
| SG22 | St. Georg<br>2020 | f | 52 | 35 | x | x | x | x | x |
| SG23 | St. Georg<br>2020 | m | 63 | 45 | x | x | x | x | x |
| SG24 | St. Georg<br>2020 | m | 17 | 45 | x | x | x | x | x |
| SG25 | St. Georg<br>2020 | m | 52 | 55 | x | x | x | x | x |
| SG26 | St. Georg<br>2020 | f | 54 | 47 | x | x | x | x | x |

|      |                   |   |    |    |   |   |   |   |   |
|------|-------------------|---|----|----|---|---|---|---|---|
| SG27 | St. Georg<br>2020 | f | 39 | 38 | x | x | x | x | x |
| SG28 | St. Georg<br>2020 | m | 15 | 38 | x | x | x | x | x |
| SG29 | St. Georg<br>2020 | m | 49 | 34 | x | x | x | x | x |
| SG30 | St. Georg<br>2020 | m | 50 | 48 | x | x | x | x | x |
| SG31 | St. Georg<br>2020 | f | 39 | 34 | x | x | x | x | x |
| SG32 | St. Georg<br>2020 | f | 34 | 35 | x | x | x | x | x |
| SG33 | St. Georg<br>2020 | f | 54 | 42 | x | x | x | x | x |
| SG34 | St. Georg<br>2020 | m | 42 | 34 | x | x | x | x | x |
| SG35 | St. Georg<br>2020 | m | 38 | 34 | x | x | x | x | x |
| SG36 | St. Georg<br>2020 | f | 40 | 34 | x | x | x | x | x |
| SG37 | St. Georg<br>2020 | f | 64 | 33 | x | x | x | x | x |
| SG38 | St. Georg<br>2020 | m | 53 | 31 | x | x | x | x | x |
| SG39 | St. Georg<br>2020 | m | 82 | 20 | x | x | x | x | x |
| SG40 | St. Georg<br>2020 | f | 84 | 11 | x | x | x | x | x |
| SG41 | St. Georg<br>2020 | f | 81 | 20 | x | x | x | x | x |
| SG42 | St. Georg<br>2020 | m | 82 | 27 | x | x | x | x | x |
| SG43 | St. Georg<br>2020 | f | 78 | 30 | x | x | x | x | x |
| SG44 | St. Georg<br>2020 | m | 88 | 22 | x | x | x | x | x |
| SG45 | St. Georg<br>2020 | f | 89 | 8  | x | x | x | x | x |
| SG46 | St. Georg<br>2020 | f | 64 | 12 | x | x | x | x | x |
| SG47 | St. Georg<br>2020 | f | 81 | 10 | x | x | x | x | x |
| SG48 | St. Georg<br>2020 | f | 81 | 1  | x | x | x | x | x |
| SG49 | St. Georg<br>2020 | m | 25 | 32 | x | x | x | x | x |
| SG50 | St. Georg<br>2020 | m | 54 | 30 | x | x | x | x | x |
| SG51 | St. Georg<br>2020 | m | 60 | 12 | x | x | x | x | x |
| SG52 | St. Georg<br>2020 | m | 68 | 15 | x | x | x |   |   |

|             |                           |          |           |          |          |          |          |          |          |
|-------------|---------------------------|----------|-----------|----------|----------|----------|----------|----------|----------|
| SG53        | St. Georg<br>2020         | f        | 47        | 21       | x        | x        | x        | x        | x        |
| SG54        | St. Georg<br>2020         | m        | 55        | 14       | x        | x        | x        | x        | x        |
| SG55        | St. Georg<br>2021         | f        | 77        | 52       | x        | x        | x        | x        | x        |
| <b>SG56</b> | <b>St. Georg<br/>2021</b> | <b>m</b> | <b>75</b> | <b>8</b> | <b>x</b> | <b>x</b> | <b>x</b> | <b>x</b> | <b>x</b> |
| SG57        | St. Georg<br>2020         | f        | 64        | 8        | x        | x        | x        | x        | x        |
| SG58        | St. Georg<br>2020         | m        | 88        | 3        | x        | x        | x        | x        | x        |
| SG59        | St. Georg<br>2020         | m        | 83        | 14       | x        | x        | x        | x        |          |
| SG60        | St. Georg<br>2020         | m        | 31        | 29       | x        | x        | x        | x        | x        |
| SG61        | St. Georg<br>2020         | f        | 78        | 9        | x        | x        | x        | x        | x        |
| SG62        | St. Georg<br>2020         | f        | 34        | 35       | x        | x        | x        | x        | x        |
| SG63        | St. Georg<br>2020         | f        | 40        | 54       | x        | x        | x        | x        | x        |
| SG64        | St. Georg<br>2020         | f        | 37        | 33       | x        | x        | x        | x        | x        |
| SG65        | St. Georg<br>2020         | f        | 46        | 33       | x        | x        | x        | x        | x        |
| SG66        | St. Georg<br>2020         | m        | 43        | 67       | x        | x        | x        | x        | x        |
| SG67        | St. Georg<br>2020         | m        | 56        | 26       | x        | x        | x        | x        | x        |
| L1          | LIFE 2015                 | f        | 75        |          |          | x        | x        |          |          |
| L2          | LIFE 2015                 | m        | 57        |          |          | x        | x        |          |          |
| L3          | LIFE 2015                 | f        | 65        |          |          | x        | x        |          |          |
| L4          | LIFE 2015                 | m        | 76        |          |          | x        | x        |          |          |
| L5          | LIFE 2015                 | f        | 75        |          |          | x        | x        |          |          |
| L6          | LIFE 2015                 | f        | 53        |          |          | x        | x        |          |          |
| L7          | LIFE 2015                 | m        | 51        |          |          | x        | x        |          |          |
| L8          | LIFE 2015                 | m        | 77        |          |          | x        | x        |          |          |
| L9          | LIFE 2015                 | m        | 74        |          |          | x        | x        |          |          |
| L10         | LIFE 2015                 | m        | 58        |          |          | x        | x        |          |          |
| L11         | LIFE 2015                 | m        | 63        |          |          | x        | x        |          |          |
| L12         | LIFE 2015                 | m        | 64        |          |          | x        | x        |          |          |
| L13         | LIFE 2015                 | m        | 50        |          |          | x        | x        |          |          |
| L14         | LIFE 2015                 | m        | 67        |          |          | x        | x        |          |          |
| L15         | LIFE 2015                 | m        | 62        |          |          | x        | x        |          |          |
| L16         | LIFE 2015                 | f        | 56        |          |          | x        | x        |          |          |
| L17         | LIFE 2015                 | m        | 76        |          |          | x        | x        |          |          |
| L18         | LIFE 2015                 | m        | 73        |          |          | x        | x        |          |          |
| L19         | LIFE 2015                 | f        | 59        |          |          | x        | x        |          |          |
| L20         | LIFE 2015                 | m        | 79        |          |          | x        | x        |          |          |



|     |           |   |    |  |   |   |   |   |
|-----|-----------|---|----|--|---|---|---|---|
| L21 | LIFE 2015 | m | 70 |  | x | x |   |   |
| L22 | LIFE 2015 | m | 78 |  | x | x |   |   |
| L23 | LIFE 2015 | m | 77 |  | x | x |   |   |
| L24 | LIFE 2015 | m | 71 |  | x | x |   |   |
| L25 | LIFE 2015 | f | 73 |  | x | x |   |   |
| L26 | LIFE 2015 | m | 56 |  | x | x |   |   |
| L27 | LIFE 2015 | m | 76 |  | x | x |   |   |
| L28 | LIFE 2015 | m | 51 |  | x | x |   |   |
| L29 | LIFE 2015 | m | 59 |  | x | x |   |   |
| L30 | LIFE 2015 | f | 60 |  | x | x |   |   |
| L31 | LIFE 2015 | m | 58 |  | x | x |   |   |
| L32 | LIFE 2015 | m | 52 |  | x | x |   |   |
| L33 | LIFE 2015 | f | 57 |  | x | x |   |   |
| L34 | LIFE 2015 | m | 60 |  | x | x |   |   |
| L35 | LIFE 2015 | m | 54 |  | x | x |   |   |
| L36 | LIFE 2015 | f | 60 |  | x | x |   |   |
| L37 | LIFE 2015 | f | 54 |  | x | x |   |   |
| L38 | LIFE 2015 | f | 65 |  | x | x |   |   |
| L39 | LIFE 2015 | m | 67 |  | x | x |   |   |
| L40 | LIFE 2015 | m | 72 |  | x | x |   |   |
| L41 | LIFE 2015 | m | 67 |  | x | x |   |   |
| L42 | LIFE 2015 | m | 54 |  | x | x |   |   |
| L43 | LIFE 2015 | m | 69 |  | x | x |   |   |
| L44 | LIFE 2015 | f | 67 |  | x | x |   |   |
| L45 | LIFE 2015 | f | 67 |  | x | x |   |   |
| L46 | LIFE 2015 | m | 64 |  | x | x |   |   |
| L47 | LIFE 2015 | m | 53 |  | x | x |   |   |
| L48 | LIFE 2015 | m | 70 |  | x | x |   |   |
| L49 | LIFE 2015 | f | 54 |  | x | x |   |   |
| L50 | LIFE 2015 | m | 73 |  | x | x |   |   |
| L51 | LIFE 2015 | m | 56 |  | x | x |   |   |
| L52 | LIFE 2015 | f | 60 |  | x | x |   |   |
| L53 | LIFE 2015 | f | 43 |  | x |   | x | x |
| L54 | LIFE 2015 | m | 50 |  | x |   | x | x |
| L55 | LIFE 2015 | m | 75 |  | x |   | x | x |
| L56 | LIFE 2015 | m | 57 |  | x |   | x | x |
| L57 | LIFE 2015 | m | 45 |  | x |   | x | x |
| L58 | LIFE 2015 | f | 46 |  | x |   | x | x |
| L59 | LIFE 2015 | m | 41 |  | x |   | x | x |
| L60 | LIFE 2015 | f | 44 |  | x |   | x | x |
| L61 | LIFE 2015 | f | 47 |  | x |   | x | x |
| L62 | LIFE 2015 | f | 42 |  | x |   | x | x |
| L63 | LIFE 2015 | m | 49 |  | x |   | x | x |
| L64 | LIFE 2015 | f | 45 |  | x |   | x | x |
| L65 | LIFE 2015 | m | 45 |  | x |   | x | x |
| L66 | LIFE 2015 | f | 48 |  | x |   | x | x |
| L67 | LIFE 2015 | f | 67 |  | x |   | x | x |

|      |           |   |    |   |   |   |
|------|-----------|---|----|---|---|---|
| L68  | LIFE 2015 | f | 62 | x | x | x |
| L69  | LIFE 2015 | f | 48 | x | x | x |
| L70  | LIFE 2015 | f | 41 | x | x | x |
| L71  | LIFE 2015 | f | 48 | x | x | x |
| L72  | LIFE 2015 | f | 51 | x | x | x |
| L73  | LIFE 2015 | f | 49 | x | x | x |
| L74  | LIFE 2015 | m | 50 | x | x | x |
| L75  | LIFE 2015 | f | 62 | x | x | x |
| L76  | LIFE 2015 | f | 63 | x | x | x |
| L77  | LIFE 2015 | f | 67 | x | x | x |
| L78  | LIFE 2015 | f | 60 | x | x | x |
| L79  | LIFE 2015 | f | 76 | x | x | x |
| L80  | LIFE 2015 | m | 48 | x | x | x |
| L81  | LIFE 2015 | f | 65 | x | x | x |
| L82  | LIFE 2015 | f | 41 | x | x | x |
| L83  | LIFE 2015 | f | 57 | x | x | x |
| L84  | LIFE 2015 | m | 68 | x | x | x |
| L85  | LIFE 2015 | f | 76 | x | x | x |
| L86  | LIFE 2015 | m | 65 | x | x | x |
| L87  | LIFE 2015 | f | 73 | x | x | x |
| L88  | LIFE 2015 | m | 66 | x | x | x |
| L89  | LIFE 2015 | f | 78 | x | x | x |
| L90  | LIFE 2015 | m | 78 | x | x | x |
| L91  | LIFE 2015 | f | 45 | x | x | x |
| L92  | LIFE 2015 | f | 72 | x | x | x |
| L93  | LIFE 2015 | f | 49 | x | x | x |
| L94  | LIFE 2015 | f | 58 | x | x | x |
| L95  | LIFE 2015 | f | 63 | x | x | x |
| L96  | LIFE 2015 | m | 45 | x | x | x |
| L97  | LIFE 2015 | f | 43 | x | x | x |
| L98  | LIFE 2015 | m | 59 | x | x | x |
| L99  | LIFE 2015 | m | 70 | x | x | x |
| L100 | LIFE 2015 | f | 55 | x | x | x |
| L101 | LIFE 2015 | m | 74 | x | x | x |
| L102 | LIFE 2015 | m | 57 | x | x | x |
| L103 | LIFE 2015 | f | 68 | x | x | x |
| L104 | LIFE 2015 | f | 67 | x | x | x |
| L105 | LIFE 2015 | m | 43 | x | x | x |
| L106 | LIFE 2015 | m | 51 | x | x | x |
| L107 | LIFE 2015 | f | 44 | x | x | x |
| L108 | LIFE 2015 | f | 74 | x | x | x |
| L109 | LIFE 2015 | f | 63 | x | x | x |
| L110 | LIFE 2015 | f | 77 | x | x | x |
| L111 | LIFE 2015 | m | 57 | x | x | x |
| L112 | LIFE 2015 | m | 57 | x | x | x |
| L113 | LIFE 2015 | f | 45 | x | x | x |
| L114 | LIFE 2015 | m | 52 | x | x | x |

|      |           |   |    |   |   |   |
|------|-----------|---|----|---|---|---|
| L115 | LIFE 2015 | f | 64 | x | x | x |
| L116 | LIFE 2015 | f | 51 | x | x | x |
| L117 | LIFE 2015 | m | 60 | x | x | x |
| L118 | LIFE 2015 | f | 75 | x | x | x |
| L119 | LIFE 2015 | f | 73 | x | x | x |
| L120 | LIFE 2015 | m | 52 | x | x | x |
| L121 | LIFE 2015 | f | 47 | x | x | x |
| L122 | LIFE 2015 | m | 58 | x | x | x |
| L123 | LIFE 2015 | m | 43 | x | x | x |
| L124 | LIFE 2015 | f | 66 | x | x | x |
| L125 | LIFE 2015 | f | 59 | x | x | x |
| L126 | LIFE 2015 | f | 65 | x | x | x |
| L127 | LIFE 2015 | m | 50 | x | x | x |
| L128 | LIFE 2015 | m | 49 | x | x | x |
| L129 | LIFE 2015 | f | 55 | x | x | x |
| L130 | LIFE 2015 | f | 51 | x | x | x |
| L131 | LIFE 2015 | m | 59 | x | x | x |
| L132 | LIFE 2015 | m | 50 | x | x | x |
| L133 | LIFE 2015 | m | 41 | x | x | x |
| L134 | LIFE 2015 | m | 60 | x | x | x |
| L135 | LIFE 2015 | f | 52 | x | x | x |
| L136 | LIFE 2015 | m | 45 | x | x | x |
| L137 | LIFE 2015 | m | 66 | x | x | x |
| L138 | LIFE 2015 | f | 51 | x | x | x |
| L139 | LIFE 2015 | f | 30 | x | x | x |
| L140 | LIFE 2015 | f | 42 | x | x | x |
| L141 | LIFE 2015 | m | 65 | x | x | x |
| L142 | LIFE 2015 | m | 56 | x | x | x |
| L143 | LIFE 2015 | f | 55 | x | x | x |
| L144 | LIFE 2015 | f | 50 | x | x | x |
| L145 | LIFE 2015 | f | 59 | x | x | x |
| L146 | LIFE 2015 | f | 51 | x | x | x |

Table S2: Clinical parameters of serum samples collected from vaccinated persons.

| Name | Sex | Age | Days after            |                       |                       |     | 1 <sup>st</sup> and 2 <sup>nd</sup><br>vaccine | 3 <sup>rd</sup> vaccine |
|------|-----|-----|-----------------------|-----------------------|-----------------------|-----|------------------------------------------------|-------------------------|
|      |     |     | 1 <sup>st</sup> vacc. | 2 <sup>nd</sup> vacc. | 3 <sup>rd</sup> vacc. | PCR |                                                |                         |
| b1.0 | f   | 27  | -                     | -                     | -                     | -   | BNT162b2                                       | BNT162b2                |
| b1.1 | f   | 27  | 17                    | -                     | -                     | -   | BNT162b2                                       | BNT162b2                |
| b1.3 | f   | 27  | 223                   | 202                   | -                     | -   | BNT162b2                                       | BNT162b2                |
| b1.4 | f   | 27  | 241                   | 220                   | 15                    | -   | BNT162b2                                       | BNT162b2                |
| b1.5 | f   | 27  | 311                   | 290                   | 85                    | -   | BNT162b2                                       | BNT162b2                |
| b1.i | f   | 27  | 361                   | 340                   | 135                   | 34  | BNT162b2                                       | BNT162b2                |
| b2.0 | m   | 36  | -                     | -                     | -                     | -   | BNT162b2                                       | BNT162b2                |
| b2.2 | m   | 36  | 27                    | -                     | -                     | -   | BNT162b2                                       | BNT162b2                |
| b2.3 | m   | 36  | 172                   | 151                   | -                     | -   | BNT162b2                                       | BNT162b2                |
| b2.5 | m   | 36  | 318                   | 297                   | 68                    | -   | BNT162b2                                       | BNT162b2                |
| b3.0 | m   | 29  | -                     | -                     | -                     | -   | BNT162b2                                       | BNT162b2                |
| b3.1 | m   | 29  | 15                    | -                     | -                     | -   | BNT162b2                                       | BNT162b2                |
| b3.3 | m   | 29  | 171                   | 27                    | -                     | -   | BNT162b2                                       | BNT162b2                |
| b3.5 | m   | 29  | 317                   | 173                   | 70                    | -   | BNT162b2                                       | BNT162b2                |
| b4.1 | f   | 30  | 17                    | -                     | -                     | -   | BNT162b2                                       | BNT162b2                |
| b4.2 | f   | 30  | 26                    | 5                     | -                     | -   | BNT162b2                                       | BNT162b2                |
| b4.3 | f   | 30  | 164                   | 143                   | -                     | -   | BNT162b2                                       | BNT162b2                |
| b4.4 | f   | 30  | 253                   | 232                   | 30                    | -   | BNT162b2                                       | BNT162b2                |
| b4.5 | f   | 30  | 317                   | 296                   | 94                    | -   | BNT162b2                                       | BNT162b2                |
| b5.1 | f   | 28  | 14                    | -                     | -                     | -   | BNT162b2                                       | BNT162b2                |
| b5.3 | f   | 28  | 170                   | 141                   | -                     | -   | BNT162b2                                       | BNT162b2                |
| b5.5 | f   | 28  | 316                   | 287                   | 84                    | -   | BNT162b2                                       | BNT162b2                |
| b6.2 | f   | 59  | 28                    | 7                     | -                     | -   | BNT162b2                                       | BNT162b2                |
| b6.3 | f   | 59  | 171                   | 150                   | -                     | -   | BNT162b2                                       | BNT162b2                |
| b6.4 | f   | 59  | 229                   | 208                   | 16                    | -   | BNT162b2                                       | BNT162b2                |
| b6.5 | f   | 59  | 317                   | 296                   | 104                   | -   | BNT162b2                                       | BNT162b2                |
| b7.1 | m   | 58  | 15                    | -                     | -                     | -   | BNT162b2                                       | BNT162b2                |
| b7.2 | m   | 58  | 29                    | 8                     | -                     | -   | BNT162b2                                       | BNT162b2                |

|       |   |    |     |     |     |    |           |           |
|-------|---|----|-----|-----|-----|----|-----------|-----------|
| b7.3  | m | 58 | 174 | 153 | -   | -  | BNT162b2  | BNT162b2  |
| b7.4  | m | 58 | 220 | 199 | 14  | -  | BNT162b2  | BNT162b2  |
| b7.5  | m | 58 | 322 | 301 | 116 | -  | BNT162b2  | BNT162b2  |
| b7.i  | m | 58 | 373 | 352 | 167 | 15 | BNT162b2  | BNT162b2  |
| b8.5  | f | 45 | 314 | 293 | 102 | -  | BNT162b2  | BNT162b2  |
| b9.5  | f | 45 | 304 | 283 | 104 | -  | BNT162b2  | BNT162b2  |
| b10.5 | m | 26 | 244 | 216 | 63  | -  | BNT162b2  | BNT162b2  |
| b11.5 | f | 26 | 285 | 264 | 102 | -  | BNT162b2  | BNT162b2  |
| b12.5 | f | 50 | 305 | 284 | 96  | -  | BNT162b2  | BNT162b2  |
| b13.5 | m | 33 | 307 | 283 | 102 | -  | BNT162b2  | BNT162b2  |
| b14.5 | m | 41 | 315 | 294 | 102 | -  | BNT162b2  | BNT162b2  |
| m1.0  | m | 36 | -   | -   | -   | -  | mRNA-1273 | mRNA-1273 |
| m1.1  | m | 36 | 7   | -   | -   | -  | mRNA-1273 | mRNA-1273 |
| m1.5  | m | 36 | 295 | 267 | 91  | -  | mRNA-1273 | mRNA-1273 |
| m2.0  | m | 28 | 2   | -   | -   | -  | mRNA-1273 |           |
| m2.1  | m | 28 | 16  | -   | -   | -  | mRNA-1273 |           |
| m2.2  | m | 28 | 37  | 9   | -   | -  | mRNA-1273 |           |
| m3.0  | m | 33 | -   | -   | -   | -  | mRNA-1273 | mRNA-1273 |
| m3.1  | m | 33 | 12  | -   | -   | -  | mRNA-1273 | mRNA-1273 |
| m3.2  | m | 33 | 33  | 5   | -   | -  | mRNA-1273 | mRNA-1273 |
| m3.3  | m | 33 | 212 | 184 | -   | -  | mRNA-1273 | mRNA-1273 |
| m3.4  | m | 33 | 230 | 202 | 18  | -  | mRNA-1273 | mRNA-1273 |
| m3.5  | m | 33 | 300 | 272 | 88  | -  | mRNA-1273 | mRNA-1273 |
| m3.i  | m | 33 | 350 | 322 | 138 | 49 | mRNA-1273 | mRNA-1273 |
| m4.0  | f | 28 | -   | -   | -   | -  | mRNA-1273 |           |
| m4.1  | f | 28 | 14  | -   | -   | -  | mRNA-1273 |           |
| m4.2  | f | 28 | 35  | 7   | -   | -  | mRNA-1273 |           |
| m5.5  | f | 60 | 316 | 288 | 119 | -  | mRNA-1273 | mRNA-1273 |
| m6.2  | m | 31 | 45  | 17  | -   | -  | mRNA-1273 |           |
| m7.0  | f | 27 | 2   | -   | -   | -  | mRNA-1273 |           |
| m7.1  | f | 27 | 16  | -   | -   | -  | mRNA-1273 |           |

|       |   |    |     |     |     |    |           |          |
|-------|---|----|-----|-----|-----|----|-----------|----------|
| m7.2  | f | 27 | 37  | 9   | -   | -  | mRNA-1273 |          |
| mb1.0 | m | 32 | -   | -   | -   | -  | mRNA-1273 | BNT162b2 |
| mb1.1 | m | 32 | 14  | -   | -   | -  | mRNA-1273 | BNT162b2 |
| mb1.2 | m | 32 | 35  | 7   | -   | -  | mRNA-1273 | BNT162b2 |
| mb1.3 | m | 32 | 154 | 126 | -   | -  | mRNA-1273 | BNT162b2 |
| mb1.4 | m | 32 | 214 | 186 | 15  | -  | mRNA-1273 | BNT162b2 |
| mb1.5 | m | 32 | 302 | 274 | 103 | -  | mRNA-1273 | BNT162b2 |
| mb2.0 | f | 25 | -   | -   | -   | -  | mRNA-1273 | BNT162b2 |
| mb2.1 | f | 25 | 12  | -   | -   | -  | mRNA-1273 | BNT162b2 |
| mb2.2 | f | 25 | 33  | 5   | -   | -  | mRNA-1273 | BNT162b2 |
| mb2.3 | f | 25 | 212 | 184 | -   | -  | mRNA-1273 | BNT162b2 |
| mb2.4 | f | 25 | 230 | 202 | 18  | -  | mRNA-1273 | BNT162b2 |
| mb2.5 | f | 25 | 300 | 272 | 88  | -  | mRNA-1273 | BNT162b2 |
| mb2.i | f | 25 | 350 | 322 | 138 | 49 | mRNA-1273 | BNT162b2 |
| mb3.1 | m | 22 | 14  | -   | -   | -  | mRNA-1273 | BNT162b2 |
| mb3.2 | m | 22 | 35  | 7   | -   | -  | mRNA-1273 | BNT162b2 |
| mb3.3 | m | 22 | 168 | 140 | -   | -  | mRNA-1273 | BNT162b2 |
| mb3.4 | m | 22 | 224 | 196 | 13  | -  | mRNA-1273 | BNT162b2 |
| mb3.5 | m | 22 | 312 | 284 | 101 | -  | mRNA-1273 | BNT162b2 |
| mb4.1 | m | 24 | 14  | -   | -   | -  | mRNA-1273 | BNT162b2 |
| mb4.2 | m | 24 | 35  | 7   | -   | -  | mRNA-1273 | BNT162b2 |
| mb4.4 | m | 24 | 224 | 196 | 13  | -  | mRNA-1273 | BNT162b2 |
| mb4.5 | m | 24 | 312 | 284 | 101 | -  | mRNA-1273 | BNT162b2 |
| mb4.i | m | 24 | 363 | 335 | 152 | 24 | mRNA-1273 | BNT162b2 |
| mb5.5 | m | 32 | 308 | 280 | 102 | -  | mRNA-1273 | BNT162b2 |

Table S3. List of tested peptides with corresponding sequences, positions in the S1- and M-protein, and peptide purity. Peptides were synthesized as C-terminal acids or amides (denoted as NH<sub>2</sub>).

| Peptide-ID | Sequence                                        | Position   | Purity |
|------------|-------------------------------------------------|------------|--------|
| S1         | MFVFLVLLPLVSSQCVNLT                             | S1-19      | 98%    |
| S22        | TQLPPAYTNSFTRG-NH <sub>2</sub>                  | S22-35     | >95%   |
| S182       | KQGNFKNLREFVFK-NH <sub>2</sub>                  | S182-195   | >95%   |
| S352       | AWNRRKISNCVAD-NH <sub>2</sub>                   | S352-364   | 94%    |
| S452       | LYRLFRKSNLKPFE-NH <sub>2</sub>                  | S452-465   | >95%   |
| S655       | VNNSYECDIPIGAGICA-NH <sub>2</sub>               | S655-672   | 95%    |
| S782       | AQVKQIYKTPPIKDFG-NH <sub>2</sub>                | S782-798   | 98%    |
| S803       | SQILPDPSKPSKRSFIEDL-NH <sub>2</sub>             | S803-821   | >95%   |
| S811       | KPSKRSFIEDLL-NH <sub>2</sub>                    | S811-822   | 98%    |
| S881       | TITSGWTFGAGAAL-NH <sub>2</sub>                  | S881-894   | >95%   |
| S1148      | HLMSFPQSAPH-NH <sub>2</sub>                     | S1148-1158 | 99%    |
| S1191      | KNLNESLIDLQELG-NH <sub>2</sub>                  | S1191-1204 | >95%   |
| RBD392     | FTNVYADSFVIRGDEVQRQIAPGQTGKIADY-NH <sub>2</sub> | S392-421   | 92%    |
| RBD481     | NGVEGFNCYFPLQSYGFQPTNGVGYPYRV-NH <sub>2</sub>   | S481-510   | 98%    |
| M1         | MADSNGTITVEELKKLLE                              | M1-18      | 98%    |
| M4         | SNGTITVEELKKLLEQWN                              | M4-21      | >95%   |
| M101       | RLFARTRSMWSFNP                                  | M101-114   | 83%    |
| M173       | SRTLSEYKLGASQR                                  | M173-186   | >95%   |
| M188       | AGDSGFAAYSRYR                                   | M188-200   | 94%    |
| M204       | YKLNTDHSSSSDNIALLVQ                             | M204-222   | 98%    |

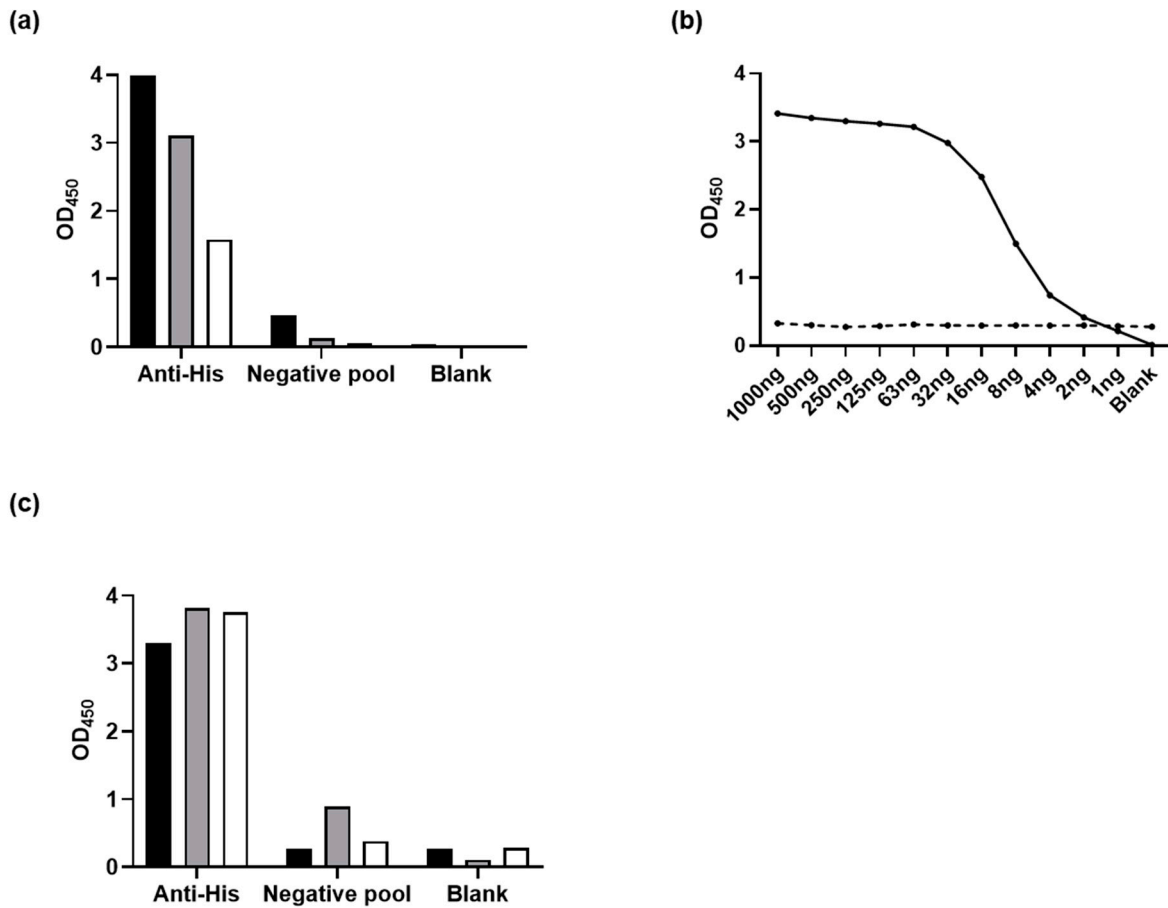

Figure S1. Optimization of the S1-protein (expressed in *E. coli*) ELISA by testing different (a) coating buffers including carbonate buffer (Black, pH 9.6), PBS (grey, pH 7.4) and acetate buffer (white, pH 5.0); (b) S1-protein quantities with positive (solid line) and negative (dash line) pool; (c) plate types including medium binding from Greiner (Black), medium binding from Brand (Grey), and Maxisorp from Nunc (white) using anti-His (10,000-fold dilution in Stabilzyme) and negative pool (100-fold dilution in Assay diluent).



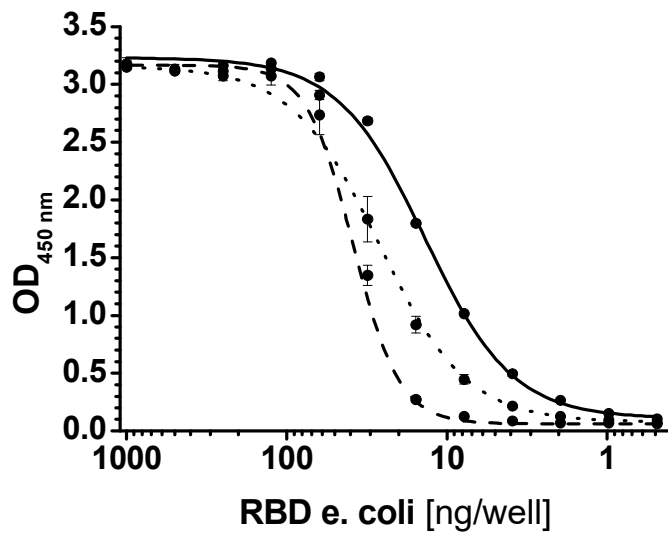

Figure S2. Optimization of the RBD *E. coli* ELISA by testing different coating buffers including PBS (line, pH 7.4), acetate (dashed, pH 5.0) and carbonate (pointed, pH 9.2) using anti-His antibody (10,000-fold dilution in Stabilzyme).

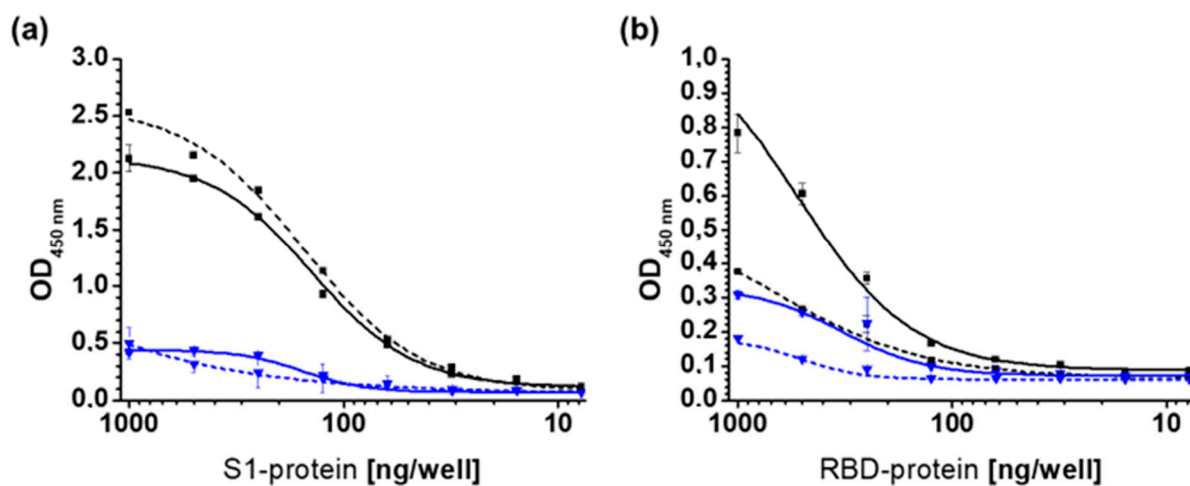

Figure S3. Absorbance recorded in ELISA using (a) S1- and (b) RBD-proteins expressed in *E. coli* and coating buffers without (solid line) and with DTT (dashed lines) using a positive (black) and negative (blue) serum pool as secondary antibody (25,000-fold dilution).

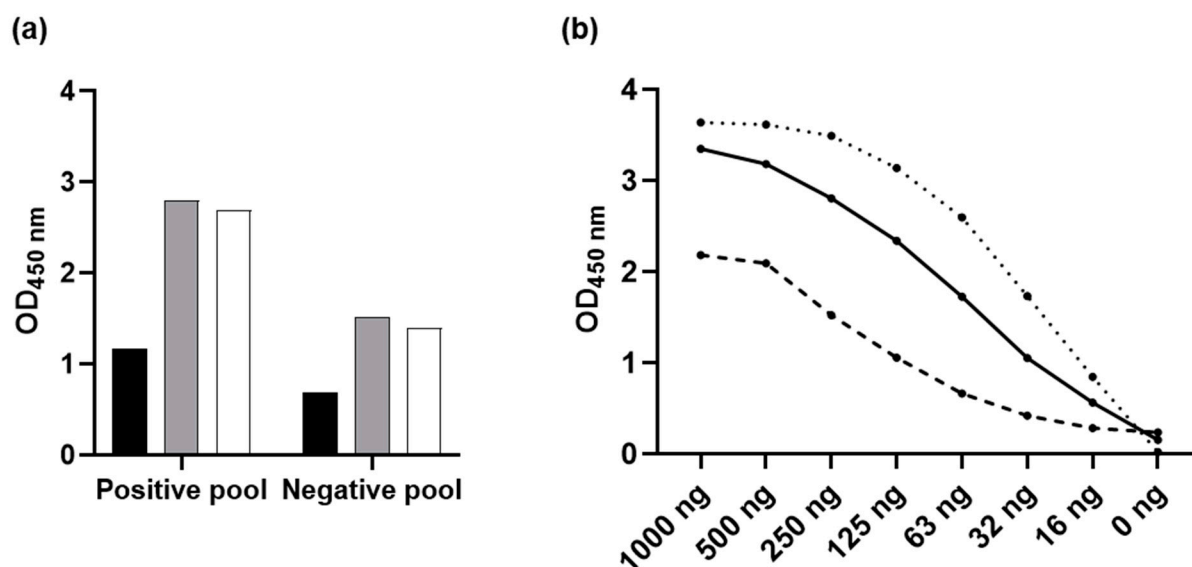

Figure S4. Absorbance recorded in ELISA when coating the full-length M-protein (1  $\mu$ g/well) expressed in *E. coli* from (a) PBS (black bars), PBS supplemented with urea (4 mol/L; grey bars), and PBS supplemented with urea (4 mol/L) and DTT (5 mmol/L; white bars) or (b) in a twofold dilution series in PBS probed with an anti-His antibody (dotted line, 10,000-fold dilution in Stabilzyme), a positive pool (solid line, 100-fold dilution in Assay diluent), and a negative pool (dashed line, 100-fold dilution in Assay diluent).

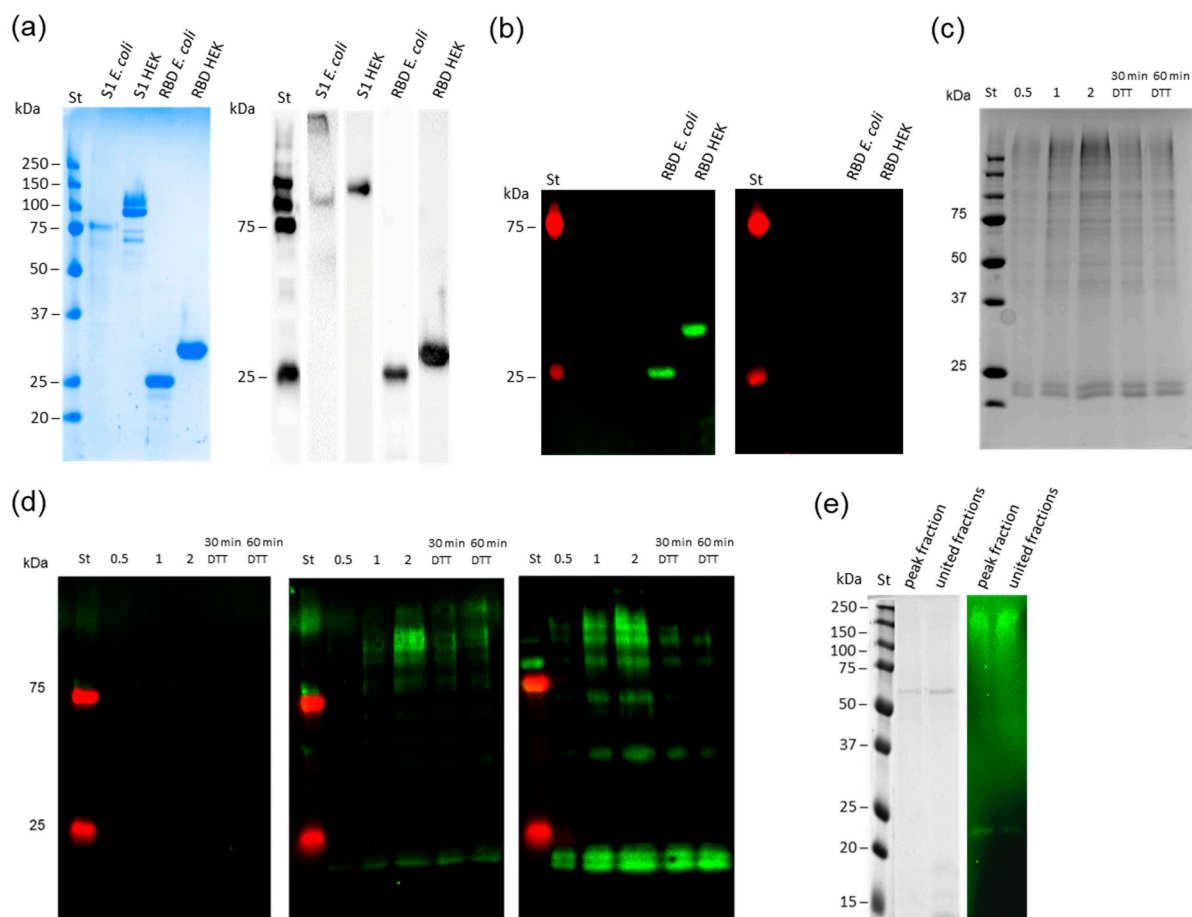

Figure S5. SDS-PAGE and corresponding immunoblots of purified SARS-CoV-2 S1-, RBD-, and M-proteins. A protein standard with the molecular weights indicated on the left side of the gels and immunoblots was loaded in the first lane. Gels were stained with Coomassie Brilliant Blue R254. S1- and RBD-proteins (1  $\mu$ g each) expressed in *E. coli* or HEK cells (a, left) and the corresponding immunoblots probed with an anti-His-tag antibody (a, right) and with SARS-CoV-2 positive (b, left) or negative serum pools (b, right). SDS-PAGE of the *E. coli* M-proteins loaded at different quantities indicated on top of each lane or after reduction of M-protein (1  $\mu$ g) using dithiothreitol (5 mmol/L, 50  $^{\circ}$ C; c) and the corresponding immunoblots probed with negative serum (d, left) or positive serum pools (d, middle) and an anti-His-tag antibody (d, right). The positive and negative pools were 10,000-fold and the anti-His-tag antibody 15,000-fold diluted in PBS. SDS-PAGE (e, left) and immunoblot (e, right) of the HEK M-protein loaded with the peak fraction and united fractions of the last purification step (size-exclusion chromatography). The C-terminal TwinStrep tagged M-protein was detected via Strep-HRP derivate.

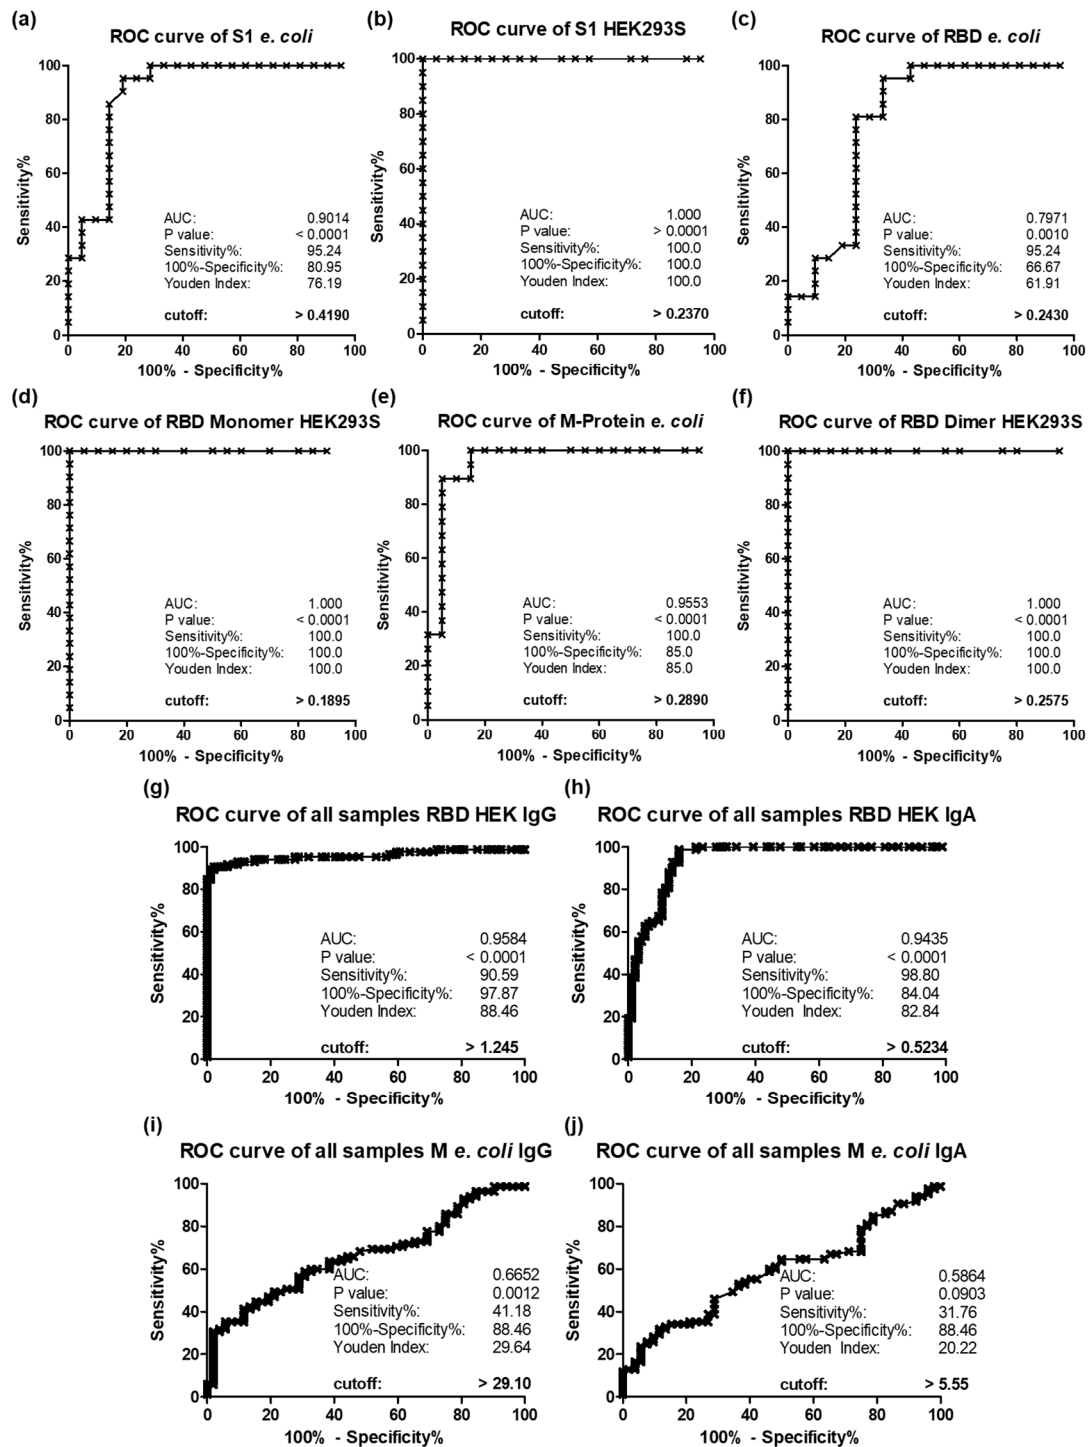

Figure S6. Calculated ROC-curves (GraphPad Prism 5.02) including cutoff, sensitivity and specificity for all established protein ELISA tested for a set of 20 positive and 20 control samples (a-f) and the whole serum sample set consisting of 115 and 94 samples (g), 113 and 94 samples (g), 115 and 52 samples (i) and (j), respectively. The ELISA used S1-proteins expressed in *E. coli* (a) or HEK293 cells (b), RBD-proteins expressed in *E. coli* (c) or HEK293S cells (d), M-protein expressed in *E. coli* (e), the RBD dimer expressed in HEK293S cells (f) and the whole sample set.

The ELISA probed the sera for anti-protein IgG antibodies (a-g, i) and IgA (h, j). Cutoffs were determined using the Youden index.

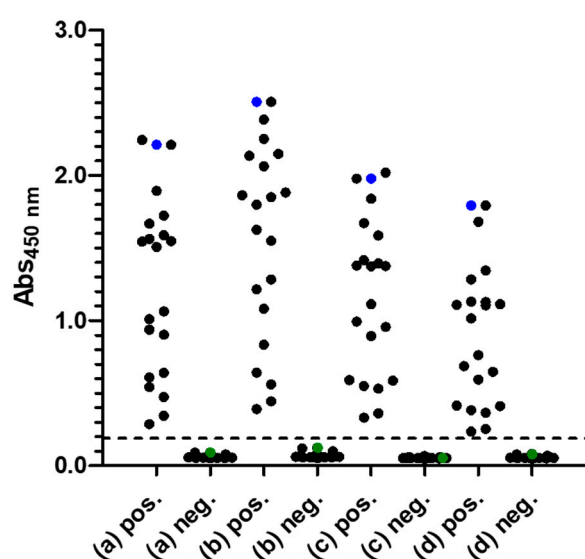

Figure S7. Distribution of OD<sub>450</sub>-values obtained from 20 SARS-CoV-2 positive and 20 negative human serum samples (black dots) comparing monomeric (a) and dimeric RBD-protein versions expressed in HEK cells (b) and commercial RBD-proteins obtained from GenScript Biotech Corp (New Jersey, USA) (c) and Biotype GmbH (Dresden, Germany) (d) probed for IgG antibodies. Positive and negative pools are indicated as blue and green dots, respectively. The cutoff of the in-house ELISA using monomeric RBD is indicated as a dotted line (0.1895).

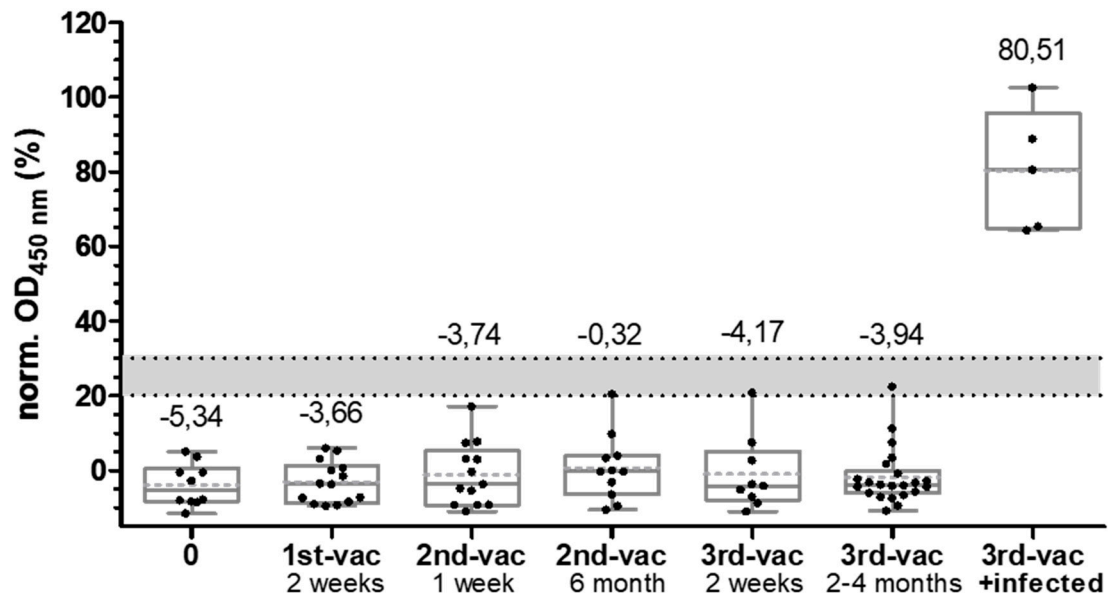

Figure S8. Distribution of normalized OD<sub>450</sub>-values obtained from serum samples collected from persons vaccinated with mRNA vaccines BNT162b2 or mRNA-1273 and confirmed SARS-CoV-2 infections tested in ELISA for IgG antibodies recognizing N-protein expressed in *E. coli*. Positive (100%) and negative pools (0%) tested on each plate were used for normalization. The cutoff range is indicated as grey area between the dotted lines.

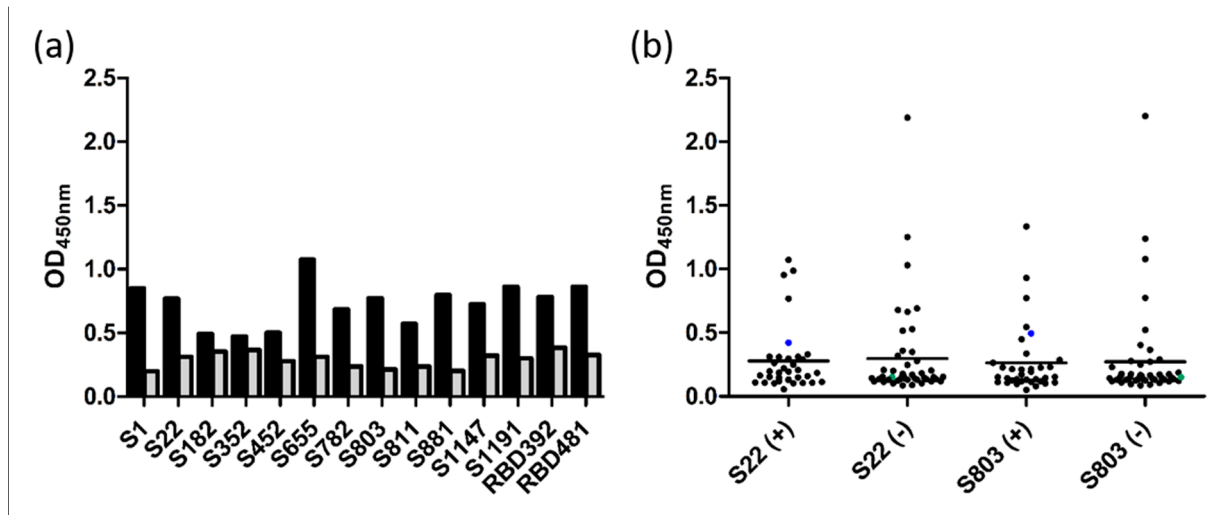

Figure S9: OD<sub>450</sub>-values obtained for S- and RBD-peptides tested in ELISA for IgG antibodies using (a) pooled positive (black) and negative (grey) sera or (b) sera of infected (+) or non-infected (-) patients. The positive and negative pools are indicated as blue and green dots (b), respectively.



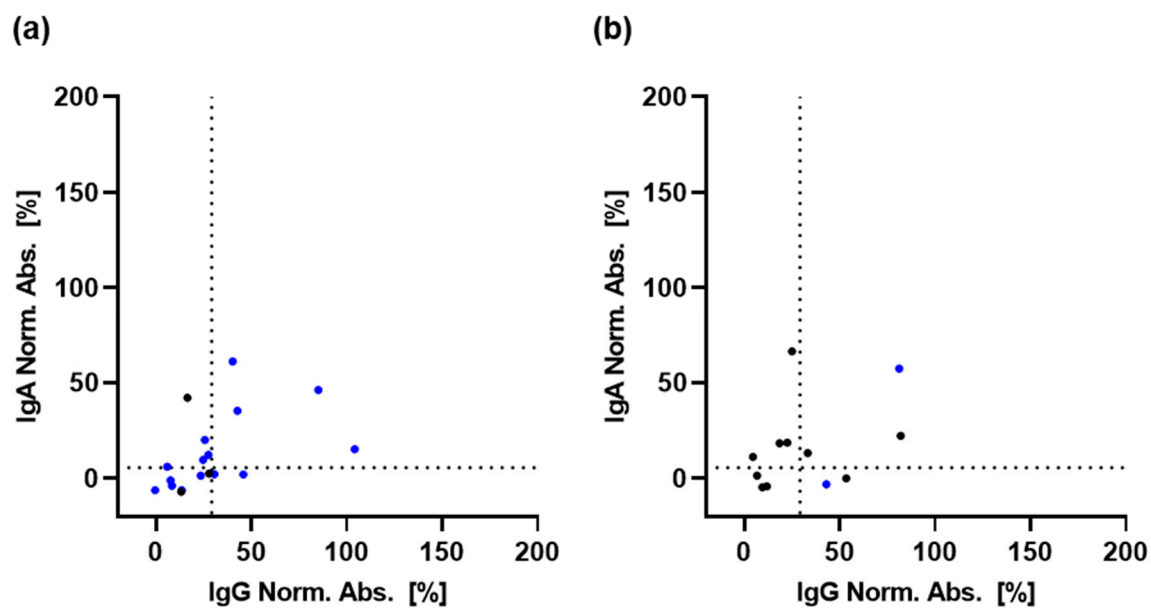

Figure S10. Comparison of normalized IgA and IgG absorbances obtained by the M-protein ELISA for patient samples of groups 1 (a) and 2 (b) based on symptom onset (black) or PCR confirmation (blue).

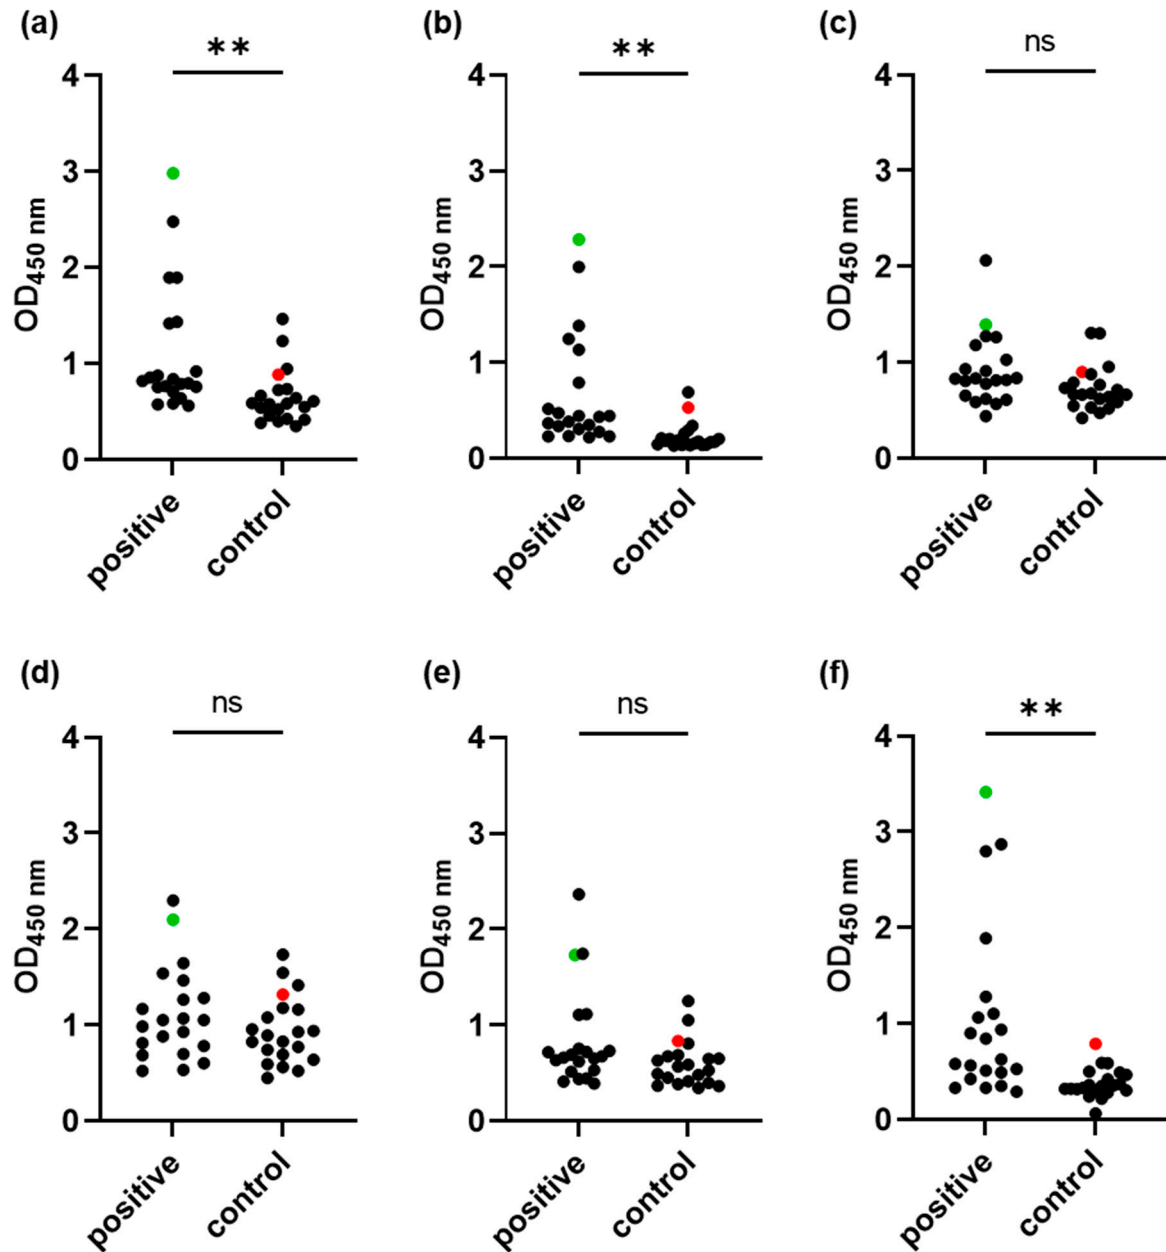

Figure S11. OD<sub>450</sub>-values obtained by testing 20 positive and 20 control serum samples in peptide ELISAs for IgG antibodies recognizing (a) M1, (b) M4, (c) M101, (d) M179, (e) M188, and (f) M204 peptides. The positive and negative pools are indicated as blue and green dots, respectively. Asterisk indicates significance \*\*  $P \leq 0.01$ , ns: not significant.

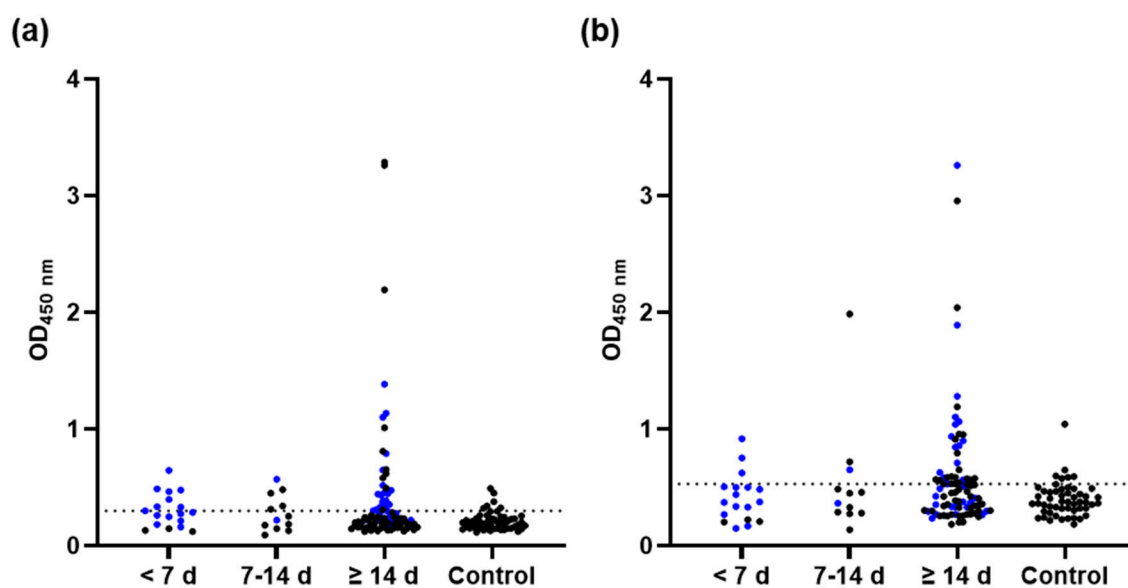

Figure S12. OD<sub>450</sub>-values obtained by testing (a) M4 and (b) M204 peptides corresponding to residues 4-21 and 204-222 of M-protein in the peptide-ELISA probed for IgG antibodies using all serum samples of groups 1 to 3 based on symptom onset (black dots, N = 48) or PCR test confirmation (blue dots, N = 67) and 52 control samples. The cutoff values of the M4 and M204 ELISA were 0.27 and 0.51, respectively, based on ROC curve analyses.

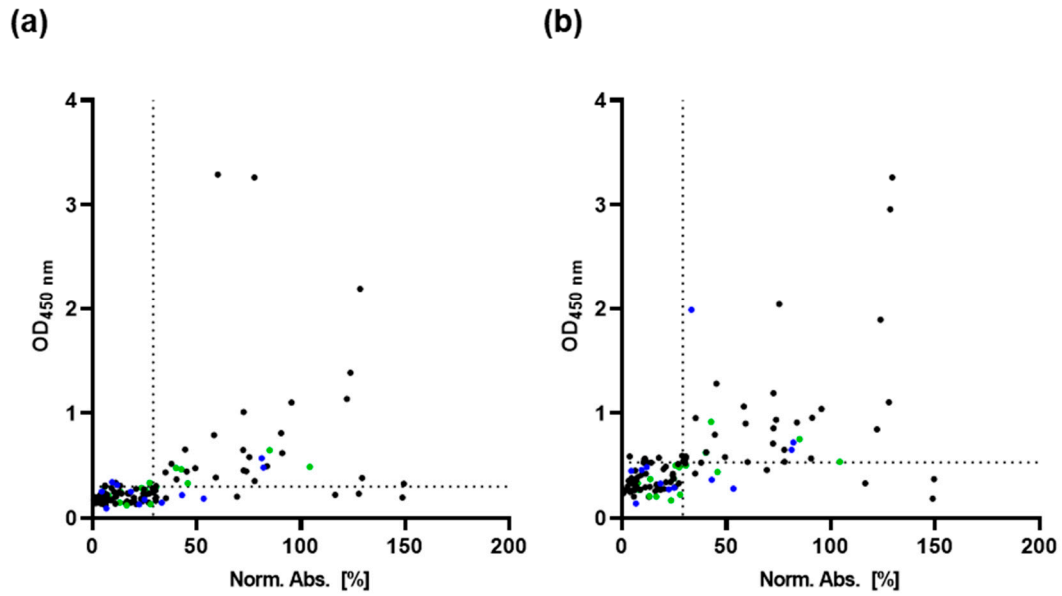

Figure S13. Scatter plots displaying the OD<sub>450</sub>-values obtained for all serum samples of groups 1 (green dots), 2 (blue dots), and 3 (black dots) by using the ELISA results obtained for (a) M4 or (b) M204 peptides (ordinate) and the normalized absorbances of the M-protein (abscissa) probed for IgG antibodies. Dotted lines indicate the cutoffs calculated for M4 peptide (0.27), M204 peptide (0.51), and M-protein (29.1%).

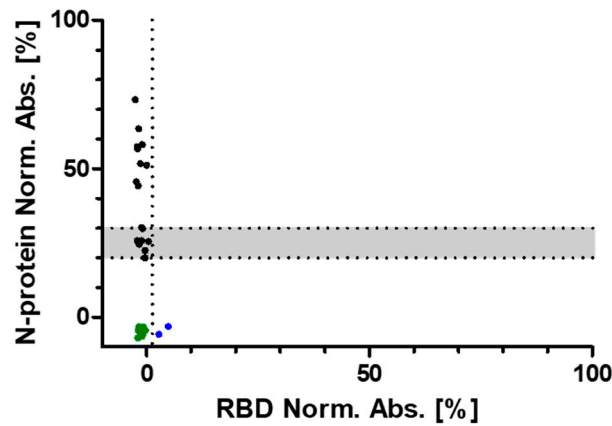

Figure S14. Distribution of the normalized absorbances obtained from ten negative human serum samples (green), two false positive samples identified in the RBD-protein ELISA (blue), and 18 false positive samples in the N-protein ELISA (black) testing each sample for IgG antibodies in ELISA against N-protein expressed in *E. coli* and RBD-protein expressed in HEK cells based IgG ELISA normalized to each. OD<sub>450</sub>-values were normalized to positive (100%) and negative pools (0%). The cutoff range of the N-protein is indicated as a grey area between dotted lines (20-30%) and the cutoff value of the RBD protein as dotted line (1.25%).

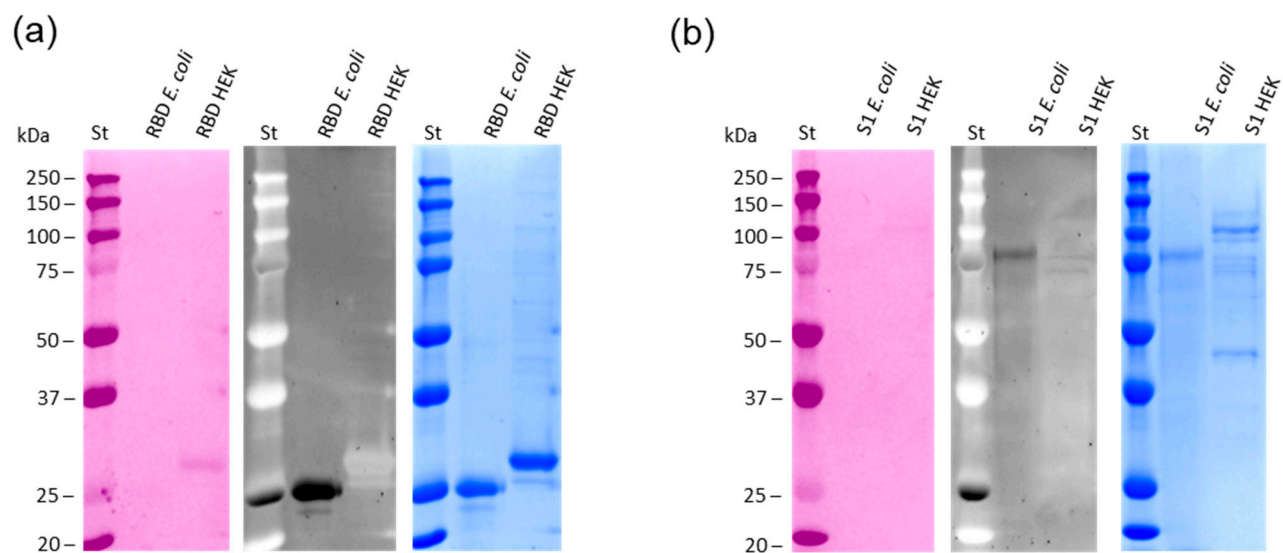

Figure S15. Glyco- (pink), Oriole- (black), and Coomassie-stains (blue) of RBD- (a) and S1- proteins (b) expressed in *E. coli* and HEK. The pink (left) or white (middle) bands in lane 1 resemble glycosylated proteins, while the black band (middle) indicates a non-glycosylated protein, which are all visible in the Coomassie stain.

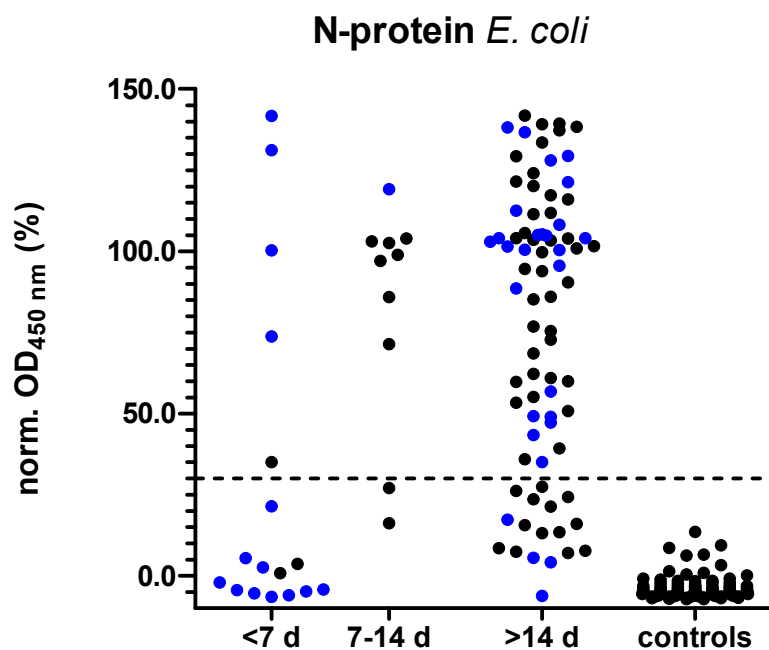

Figure S16. Distribution of normalized OD<sub>450</sub>-values measured in ELISA for all SARS-CoV-2 positive samples of groups 1 to 3 (N = 113) and 94 control human serum samples coating N-protein expressed in *E. coli* cells and probing for IgG antibodies. Samples were grouped based on the time period after symptom onset (black dots, N = 66) or a positive PCR test (blue dots, N = 47). The OD<sub>450</sub>-values determined for positive (= 100%) and negative pools (= 0%) on each plate were used for normalization. The cutoff value was obtained from earlier studies and is indicated as dashed line.
